# Supplementary material for: The Impacts of Crystalline Structure and Different Surface Functional Groups on Drug Release and the Osseointegration Process of Nanostructured TiO2
Source: MDPI journal article supplement (doi:10.3390/molecules26061723), 2021-03-19
Supplement: s1 [file s1]

# The Impacts of Crystalline Structure and Different Surface Functional Groups on Drug Release and the Osseointegration Process of Nanostructured TiO<sub>2</sub>

Anna Pawlik <sup>1</sup>, Magdalena Jarosz <sup>1,\*</sup>, Robert P. Socha <sup>2</sup> and Grzegorz D. Sulka <sup>1</sup>

<sup>1</sup> Faculty of Chemistry, Jagiellonian University, Faculty of Chemistry, Gronostajowa 2, 30387 Krakow, Poland; pawlika@chemia.uj.edu.pl (A.P.); sulka@chemia.uj.edu.pl (G.D.S.)

<sup>2</sup> Jerzy Haber Institute of Catalysis and Surface Chemistry, Polish Academy of Science, Niezapominajek 8, 30239 Krakow, Poland; ncsocha@cyf-kr.edu.pl

\* Correspondence: jarosz@chemia.uj.edu.pl; Tel.: +48-126-862-520

## 1. EDS Analysis

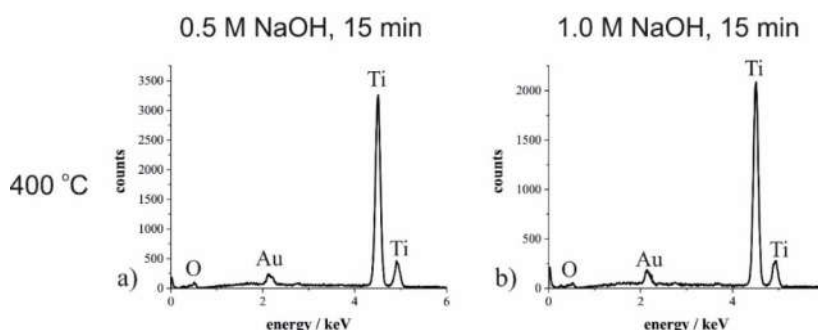

**Figure S1.** EDS spectra of nanoporous TiO<sub>2</sub> layers annealed at 400 °C for 2 h and then immersed in 0.5 M (a) and 1.0 M (b) NaOH for 15 min. The Au peak in the spectra has arisen from a gold layer sputtered before SEM examination.

**Table S1.** Elemental composition (Ti, O, Na, and F) of TiO<sub>2</sub> samples annealed at 400 °C for 2 h and then immersed in 0.5 M and 1.0 M NaOH for 15 min, calculated based on EDS spectra.

| NaOH Concentration [mol·dm <sup>-3</sup> ] | Annealing Temperature [°C] | Content [wt%] |            |           |           | Content [at%] |             |           |           |
|--------------------------------------------|----------------------------|---------------|------------|-----------|-----------|---------------|-------------|-----------|-----------|
|                                            |                            | Ti            | O          | Na        | F         | Ti            | O           | Na        | F         |
| 0.5                                        | 400                        | 76.4 ± 0.5    | 16.2 ± 0.7 | 0.1 ± 0.2 | 0.3 ± 0.4 | 60.2 ± 0.4    | 38.2 ± 1.8  | 0.1 ± 0.3 | 0.6 ± 0.8 |
|                                            | 600                        | 77.9 ± 0.6    | 14.3 ± 1.0 | 0.0 ± 0.0 | 0.5 ± 0.5 | 63.6 ± 0.5    | 34.9 ± 2.3  | 0.0 ± 0.0 | 1.0 ± 1.0 |
| 1.0                                        | 400                        | 79.3 ± 0.6    | 15.1 ± 1.2 | 0.1 ± 0.1 | 0.1 ± 0.4 | 62.9 ± 0.5    | 35.9 ± 2.9  | 0.2 ± 0.2 | 0.3 ± 0.4 |
|                                            | 600                        | 71.4 ± 0.6    | 18.9 ± 1.3 | 0.0 ± 0.0 | 0.0 ± 0.1 | 54.8 ± 0.5    | 43.45 ± 3.0 | 0.0 ± 0.0 | 0.0 ± 0.1 |

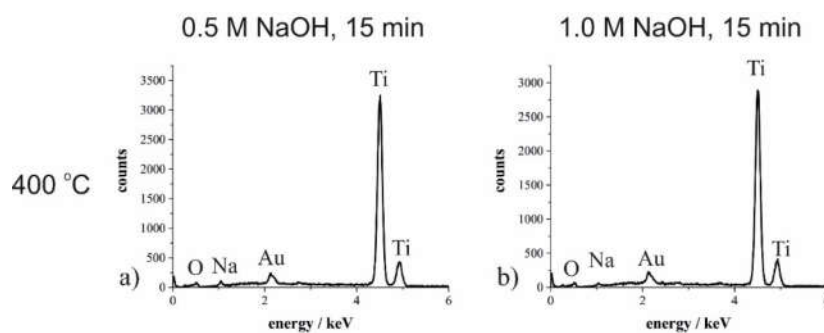

**Figure S2.** EDS spectra of nanoporous TiO<sub>2</sub> layers modified with 0.5 M (a) and 1.0 M (b) NaOH for 15 min and then annealed at 400 °C for 2 h. The Au peak in the spectra has arisen from a gold layer sputtered before SEM examination.

**Table S2.** Elemental composition (Ti, O, Na, and F) of TiO<sub>2</sub> samples modified with 0.5 M and 1.0 M NaOH for 15 min and then annealed at 400 °C for 2 h, calculated based on EDS spectra.

| NaOH Con-<br>centration<br>[mol·dm <sup>-3</sup> ] | Annealing<br>Tempera-<br>ture [°C] | Content [wt%] |            |           |           | Content [at%] |            |           |           |
|----------------------------------------------------|------------------------------------|---------------|------------|-----------|-----------|---------------|------------|-----------|-----------|
|                                                    |                                    | Ti            | O          | Na        | F         | Ti            | O          | Na        | F         |
| 0.5                                                | 400                                | 77.0 ± 0.5    | 13.5 ± 0.7 | 2.2 ± 0.1 | 0.3 ± 0.3 | 62.3 ± 0.4    | 32.6 ± 1.8 | 3.7 ± 0.2 | 0.6 ± 0.8 |
|                                                    | 600                                | 76.7 ± 0.6    | 13.1 ± 1.2 | 2.0 ± 0.1 | 0.0 ± 0.0 | 62.9 ± 0.5    | 32.1 ± 2.9 | 3.4 ± 0.2 | 0.0 ± 0.0 |
| 1.0                                                | 400                                | 76.7 ± 0.6    | 15.0 ± 1.1 | 1.3 ± 0.2 | 0.1 ± 0.4 | 60.8 ± 0.4    | 35.1 ± 2.5 | 2.1 ± 0.3 | 0.2 ± 0.6 |
|                                                    | 600                                | 73.2 ± 0.6    | 15.8 ± 1.1 | 3.2 ± 0.2 | 0.0 ± 0.0 | 56.7 ± 0.4    | 36.6 ± 2.6 | 5.2 ± 0.3 | 0.0 ± 0.0 |

## 2. XPS analysis

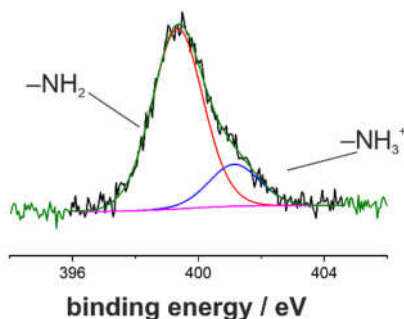

**Figure S3.** Core-level XPS spectra of N 1s for the ANan sample.

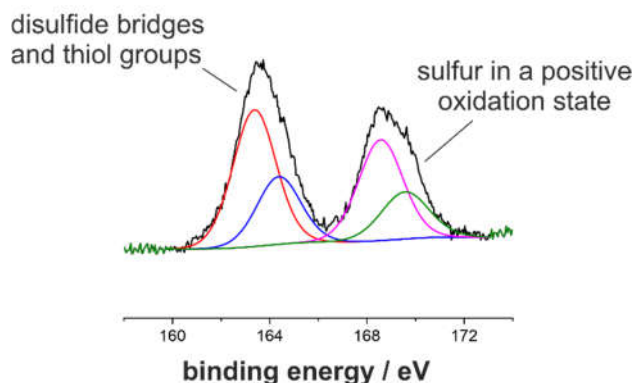

**Figure S4.** Core-level XPS spectra of S 2p for the MNaN sample.

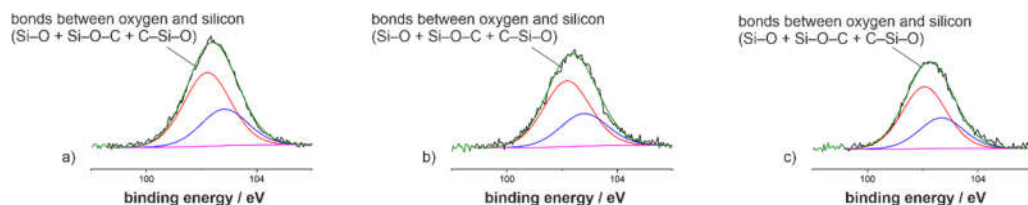

**Figure S5.** Core-level XPS spectra of Si 2p for the ANan (a), GNan (b) and MNan (c) samples.

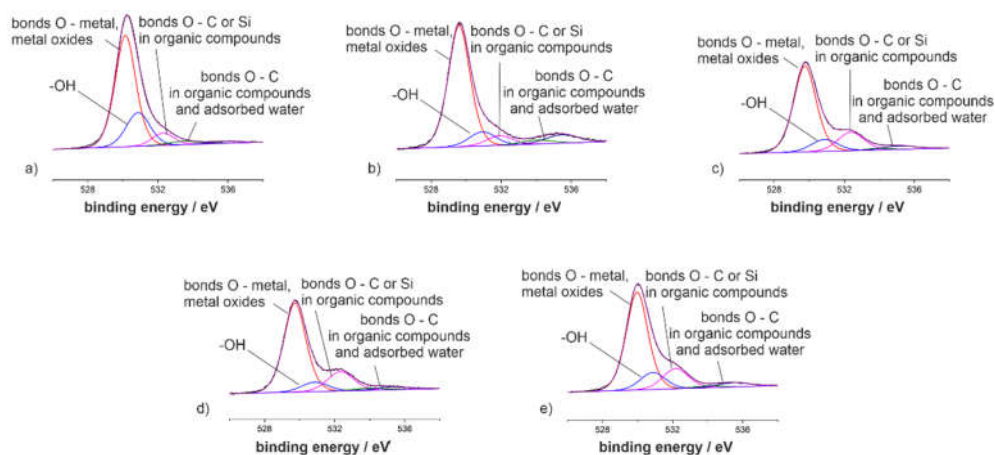

**Figure S6.** Core-level XPS spectra of O 1s for the an (a), Nan (b), ANan (c), GNan (d) and MNan (e) samples.

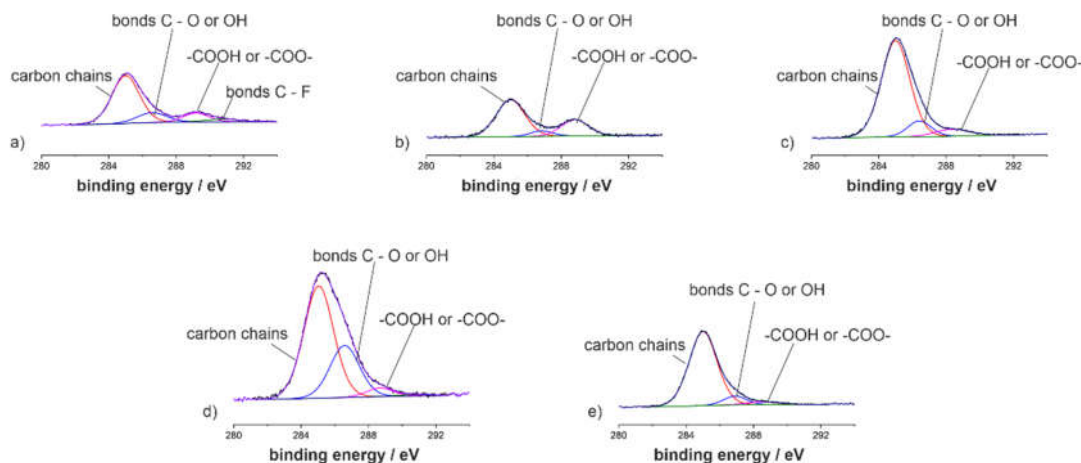

**Figure S7.** Core-level XPS spectra of C 1s for the an (a), Nan (b), ANan (c), GNan (d) and MNan (e) samples.

### 3. Ibuprofen Release Kinetics

**Table S3.** The desorption-desorption-diffusion model parameters ( $f_1$ ,  $f_2$ ,  $k_1$ ,  $k_2$ ,  $K_H$ ) with parameter standard errors for the ibuprofen release from the modified and non-modified annealed TiO<sub>2</sub> layers.

| Sample | $f_1$ [-]     | $f_2$ [-]     | $k_1$ [h <sup>-1</sup> ] | $k_2$ [h <sup>-1</sup> ] | $K_H$ [h <sup>-0.5</sup> ] | $R^2$ |
|--------|---------------|---------------|--------------------------|--------------------------|----------------------------|-------|
| an     | 0.150 ± 0.005 | 0.962 ± 0.003 | 35 ± 2                   | 0.75 ± 0.01              | 0.0031 ± 0.0004            | 0.999 |
| Nan    | 0.084 ± 0.004 | 0.983 ± 0.003 | 56 ± 6                   | 0.60 ± 0.01              | 0.0014 ± 0.0004            | 0.999 |
| ANan   | 0.418 ± 0.014 | 0.910 ± 0.006 | 49 ± 38                  | 1.70 ± 0.11              | 0.0133 ± 0.0016            | 0.999 |
| GNan   | 0.092 ± 0.002 | 0.980 ± 0.002 | 75 ± 4                   | 0.65 ± 0.01              | 0.0015 ± 0.0002            | 0.999 |
| MNan   | 0.123 ± 0.004 | 0.973 ± 0.003 | 56 ± 4                   | 0.93 ± 0.01              | 0.0024 ± 0.0003            | 0.999 |

**Table S4.** The amount of ibuprofen released after pre-determined time points, namely 10, 60 s, 10, 30 min, 1, 2, 24, and 168 h, from the modified and non-modified annealed TiO<sub>2</sub> layers.

| Sample | Mass of Released Ibuprofen [mg] |             |             |           |           |           |           |           |
|--------|---------------------------------|-------------|-------------|-----------|-----------|-----------|-----------|-----------|
|        | 10 s                            | 60 s        | 10 min      | 30 min    | 1 h       | 2 h       | 24 h      | 168 h     |
| an     | 0.03 ± 0.01                     | 0.15 ± 0.06 | 0.47 ± 0.14 | 0.8 ± 0.2 | 1.1 ± 0.2 | 1.5 ± 0.1 | 1.9 ± 0.2 | 1.9 ± 0.2 |
| Nan    | 0.04 ± 0.02                     | 0.18 ± 0.05 | 0.53 ± 0.08 | 1.0 ± 0.1 | 1.4 ± 0.2 | 2.2 ± 0.2 | 3.0 ± 0.6 | 3.0 ± 0.6 |
| ANan   | 0.04 ± 0.01                     | 0.22 ± 0.02 | 0.48 ± 0.07 | 0.6 ± 0.1 | 0.7 ± 0.2 | 0.8 ± 0.2 | 0.8 ± 0.2 | 0.9 ± 0.2 |
| GNan   | 0.06 ± 0.01                     | 0.20 ± 0.04 | 0.51 ± 0.05 | 0.9 ± 0.1 | 1.4 ± 0.2 | 2.0 ± 0.4 | 2.7 ± 0.4 | 2.7 ± 0.4 |
| MNan   | 0.04 ± 0.01                     | 0.21 ± 0.04 | 0.57 ± 0.09 | 1.0 ± 0.2 | 1.6 ± 0.5 | 2.0 ± 0.6 | 2.4 ± 0.7 | 2.4 ± 0.7 |

As can be seen from Table S4, the mass of ibuprofen released during the first 10 min is similar for all types of studied drug delivery systems (0.47 mg–0.57 mg). Within the first hour, ~81% of ibuprofen was delivered from the ANan sample, while ~57%, ~47%, ~52%, and ~65% of the drug was transferred from the an, Nan, GNan, and MNan samples, respectively (Figure 4, insets).

Based on Table S3, it can be stated that apart from the ANan sample, the drug fraction released in the whole process ( $f_2$ ) is close to 1 (0.910–0.983). The first-order kinetic constant for the 2nd stage ( $k_2$ ) is lower for the ATO samples modified with only NaOH or with NaOH and GPTMS than for the non-modified drug delivery system. The proposed ways of surface functionalization, apart from the modification with APTES, lead to an increase in the value of the Higuchi dissolution constant.

**Table S5.** The amount of ibuprofen loaded inside nanoporous TiO<sub>2</sub> layers and released after 168 h from the modified and non-modified annealed TiO<sub>2</sub> samples (with standard deviation,  $n = 3$ ).

| Sample | Mass of Loaded Ibuprofen [mg] | Mass of Released Ibuprofen [mg] |
|--------|-------------------------------|---------------------------------|
| an     | 1.9 ± 0.4                     | 1.9 ± 0.2                       |
| Nan    | 2.9 ± 0.4                     | 3.0 ± 0.6                       |
| ANan   | 0.9 ± 0.2                     | 0.9 ± 0.2                       |
| GNan   | 2.4 ± 0.1                     | 2.7 ± 0.4                       |
| MNan   | 2.1 ± 0.8                     | 2.4 ± 0.7                       |

#### 4. MG-63 cells, Fluorescent Images

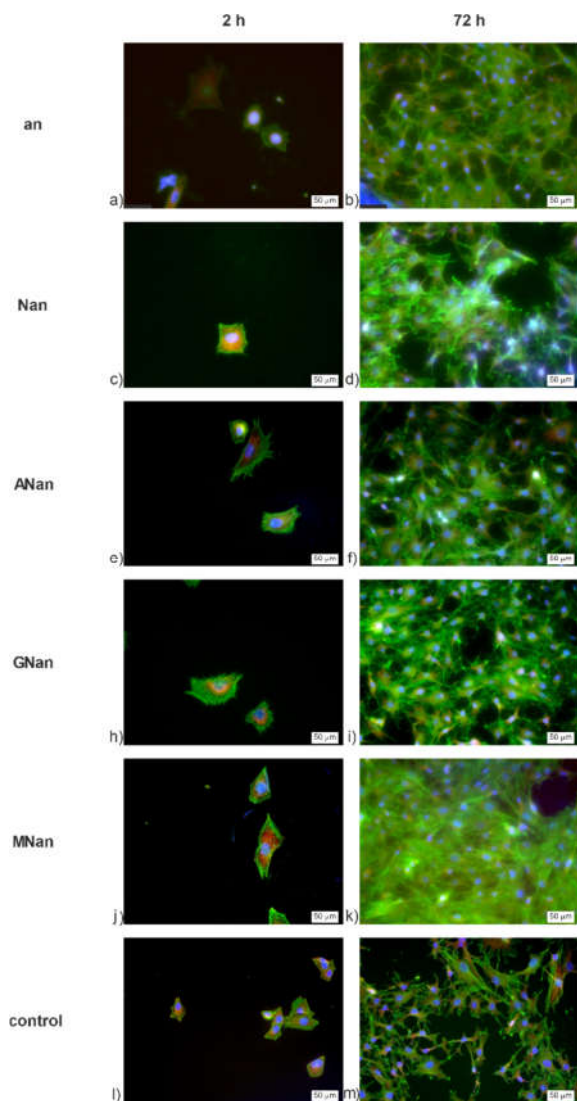

**Figure S8.** Representative immunofluorescence images of MG-63 osteoblast-like cells grown on the an (anatase  $\text{TiO}_2$ ) (**a,b**), Nan (amorphous  $\text{TiO}_2$  + NaOH + 400 °C) (**c,d**), ANan (amorphous  $\text{TiO}_2$  + NaOH + 400 °C + APTES) (**e,f**), GNan (amorphous  $\text{TiO}_2$  + NaOH + 400 °C + GPTMS) (**g,h**), MNaN (amorphous  $\text{TiO}_2$  + NaOH + 400 °C + MPTMS) (**i,j**) and control (polystyrene) (**k,l**) samples after 2 and 72 h of culture. Cells were stained with actin skeleton (green), cell nuclei (blue), and vinculin (red). Scale bar = 50  $\mu\text{m}$ .
